# Supplementary material for: Differential effects of neighborhood ambient PM2.5 exposure and social vulnerability on cancer-related systemic inflammation by race in a large health care system population from 2000--2020
Source: Research Square preprint supplement (doi:10.21203/rs.3.rs-7754269/v1), 2025-10-22
Supplement: Supplementary file 1 [file 41b74c01a4269b9e9c31231a.docx]

| **Supplementary Table 1.** **Distribution of demographic and clinical variables by race** | | | | |
| --- | --- | --- | --- | --- |
| Variable | Whites (n=155,018) | African Americans (n=63,698) | Asian  (n=6,584) | Other  (n=7,473) |
|  |  |  |  |  |
| Male Sex (%) | 43.2 | 37.5 | 43.3 | 41.6 |
| Age groups (%) |  |  |  |  |
| 30-40 | 17.6 | 29.8 | 30.9 | 28.3 |
| 40-50 | 29.6 | 32.9 | 31.9 | 33.1 |
| 50-60 | 30.6 | 23.9 | 22.6 | 23.9 |
| 60-70 | 22.2 | 13.4 | 14.7 | 14.8 |
|  |  |  |  |  |
| Number of CBC tests | 6.31 ± 6.70 | 7.37 ± 7.84 | 5.99 ± 6.60 | 6.71 ± 7.22 |
| Duration of CBC tests (years) | 4.90 ± 5.52 | 7.00 ± 6.50 | 5.31 ± 6.02 | 5.52 ± 5.84 |
|  |  |  |  |  |
| Social Vulnerability index quartiles (%) |  |  |  |  |
| 0-0.25 | 32.0 | 10.1 | 57.4 | 22.8 |
| 0.26-0.5 | 31.1 | 13.1 | 17.4 | 18.3 |
| 0.51-0.75 | 24.8 | 18.4 | 15.1 | 18.7 |
| 0.76-1 | 12.2 | 58.3 | 10.2 | 40.2 |
|  |  |  |  |  |
| Comorbidity index (%) |  |  |  |  |
| 0 | 73.2 | 71.7 | 77.4 | 73.8 |
| 1 | 17.3 | 18.7 | 15.6 | 17.7 |
| 2 | 6.4 | 6.0 | 5.0 | 5.6 |
| 3 | 3.1 | 3.6 | 2.0 | 3.0 |
|  |  |  |  |  |
| Participants diagnosed with Cancer (%) | 7.3 | 8.1 | 5.5 | 6.1 |

| **Supplementary Table 2. Causal mediation analysis modeling of social vulnerability index on the effect of PM2.5 on systemic inflammation measures by race group** | | | | | | | | | |
| --- | --- | --- | --- | --- | --- | --- | --- | --- | --- |
|  | Neutrophil Monocyte Ratio | | | |  | Neutrophil Lymphocyte Ratio | | | |
|  | β | 95% CI | | P value |  | β | 95% CI | | P value |
|  |  |  |  |  |  |  |  |  |  |
| Full Sample |  |  |  |  |  |  |  |  |  |
| Total Effect | 0.142 | 0.129 - | 0.156 | <.0001 |  | 0.025 | 0.018 - | 0.033 | <.0001 |
| Controlled Direct Effect | 0.139 | 0.125 - | 0.153 | <.0001 |  | 0.025 | 0.017 - | 0.032 | <.0001 |
| Natural Direct Effect | 0.139 | 0.125 - | 0.153 | <.0001 |  | 0.025 | 0.017 - | 0.032 | <.0001 |
| Natural Indirect Effect | 0.003 | 0.002 - | 0.004 | <.0001 |  | 0.0007 | 0.0001 - | 0.0012 | 0.0189 |
| Percentage Mediated | 2.236 | 1.450 - | 3.021 | <.0001 |  | 2.686 | 0.309 - | 5.062 | 0.0268 |
|  |  |  |  |  |  |  |  |  |  |
| Whites |  |  |  |  |  |  |  |  |  |
| Total Effect | 0.166 | 0.149 - | 0.183 | <.0001 |  | 0.040 | 0.030 - | 0.049 | <.0001 |
| Controlled Direct Effect | 0.166 | 0.149 - | 0.183 | <.0001 |  | 0.040 | 0.030 - | 0.049 | <.0001 |
| Natural Direct Effect | 0.166 | 0.149 - | 0.183 | <.0001 |  | 0.040 | 0.030 - | 0.049 | <.0001 |
| Natural Indirect Effect | -0.0004 | -0.0009 - | 0.0001 | 0.0856 |  | -0.00019 | -0.00039 - | 0.00002 | 0.0787 |
| Percentage Mediated | -0.262 | -0.562 - | 0.039 | 0.0876 |  | -0.470 | -1.007 - | 0.068 | 0.0869 |
|  |  |  |  |  |  |  |  |  |  |
| Blacks |  |  |  |  |  |  |  |  |  |
| Total Effect | 0.123 | 0.094 - | 0.152 | <.0001 |  | 0.024 | 0.009 - | 0.038 | 0.0015 |
| Controlled Direct Effect | 0.115 | 0.086 - | 0.144 | <.0001 |  | 0.019 | 0.005 - | 0.034 | 0.0103 |
| Natural Direct Effect | 0.115 | 0.086 - | 0.144 | <.0001 |  | 0.019 | 0.005 - | 0.034 | 0.0103 |
| Natural Indirect Effect | 0.008 | 0.005 - | 0.010 | <.0001 |  | 0.005 | 0.003 - | 0.006 | <.0001 |
| Percentage Mediated | 6.268 | 3.900 - | 8.637 | <.0001 |  | 19.031 | 6.313 - | 31.748 | 0.0034 |
